# Supplementary material
Source: Springer Nature journal article supplement (https://www.springermedizin.de/resource/supplementary/12879_2011_1699_MOESM12_ESM.pdf/9443266)

**Rv0867c**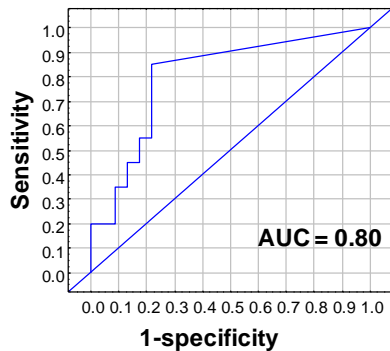**Rv2389c**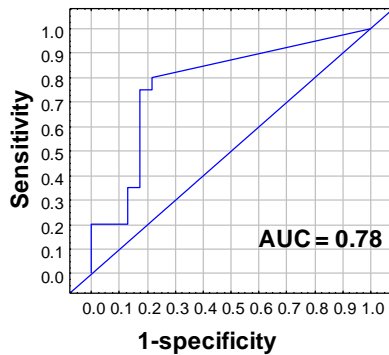**Rv2450c**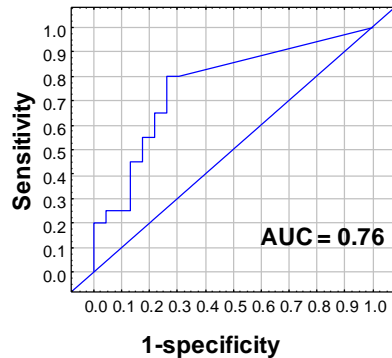**Rv1009**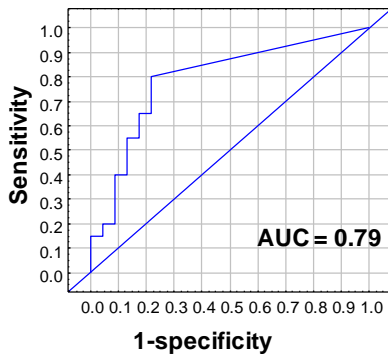**Rv1884c**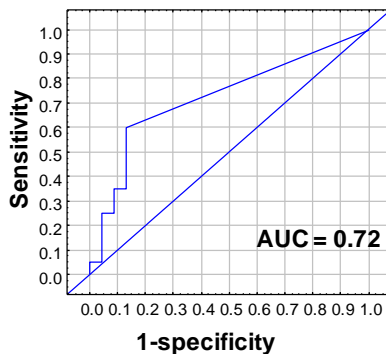

Supplement: MOESM12 [file 9443266]
